# Supplementary material for: ORTI: An Open-Access Repository of Transcriptional Interactions for Interrogating Mammalian Gene Expression Data
Source: PubMed Central journal article supplement (PMC5056720; doi:10.1371/journal.pone.0164535), 2016-10-10
Supplement: pone.0164535.s002.pdf [file pone.0164535.s002.pdf]

## Rankings of the techniques used to detect TF-TG interactions included in ORTI.

| Rank    | Biochemistry Technique                                             |
|---------|--------------------------------------------------------------------|
| 1       | AVIDIN/BIOTIN-CONJUGATED DNA BINDING ASSAY                         |
| 1       | CONCATENATE CHROMATIN IMMUNOPRECIPITATION                          |
| 1       | DNA AFFINITY CHROMATOGRAPHY                                        |
| 1       | DNA AFFINITY PRECIPITATION ASSAY                                   |
| 1       | ELECTROPHORETIC MOBILITY SHIFT ASSAY                               |
| 1       | ELECTROPHORETIC MOBILITY SHIFT ASSAY                               |
| 1       | EXPERT CURATED::LITERATURE DERIVED                                 |
| 1       | MUTAGENESIS                                                        |
| 1       | PROTEIN BINDING ASSAY::DNA-PROTEIN PRECIPITATION ASSAY             |
| 1       | PROTEIN BINDING ASSAY::DNASE FOOTPRINTING ASSAY                    |
| 1       | PROTEIN BINDING ASSAY::METHYLATION INTERFERENCE ASSAY              |
| 1       | PROTEIN BINDING ASSAY::UNKNOWN                                     |
| 1       | REPORTER GENE ASSAY::CHLORAMPHENICOL ACETYLTRANSFERASE (CAT) ASSAY |
| 1       | REPORTER GENE ASSAY::LUCIFERASE ASSAY                              |
| 1       | REPORTER GENE ASSAY::GFP EXPRESSION ASSAY                          |
| 1       | REPORTER GENE ASSAY::LACZ EXPRESSION ASSAY                         |
| 1       | REPORTER GENE ASSAY::RABBIT BETA-GLOBIN EXPRESSION ASSAY           |
| 1       | PROTEIN BINDING ASSAY:: (SOUTHWESTERN BLOTTING)                    |
| 1       | SURFACE PLASMON RESONANCE                                          |
| 2       | CHROMATIN IMMUNOPRECIPITATION::COUPLED WITH DEEP SEQUENCING        |
| 2       | CHROMATIN IMMUNOPRECIPITATION::COUPLED WITH MICROARRAY             |
| 2       | CHROMATIN IMMUNOPRECIPITATION::CPG                                 |
| 2 or 1* | CHROMATIN IMMUNOPRECIPITATION                                      |
| 2       | CHROMATIN IMMUNOPRECIPITATION::COUPLED WITH TAG SEQUENCING         |
| 2       | CHROMATIN IMMUNOPRECIPITATION::STREPTAVIDIN                        |
| 2       | REPORTER GENE ASSAY::YEAST ONE-HYBRID ASSAY                        |
| 3       | RNA EXPRESSION ASSAY::RNASE PROTECTION ASSAY (RPA)                 |
| 3       | RNA EXPRESSION ASSAY::MICROARRAY                                   |
| 3       | SEQUENCE CONSERVATION::CO-EXPRESSED GENE CONSERVATION              |
| 3       | SEQUENCE CONSERVATION::CONSERVATION FOUND BY ALIGNMENT             |
| 3       | SEQUENCE CONSERVATION::ORTHOLOGOUS GENE CONSERVATION               |

\* The source database reported these studies as "ChIP" without any further details, any study with >5 hits was expertly curated.
